# Supplementary material
Source: PubMed Central journal article supplement (PMC1482640)

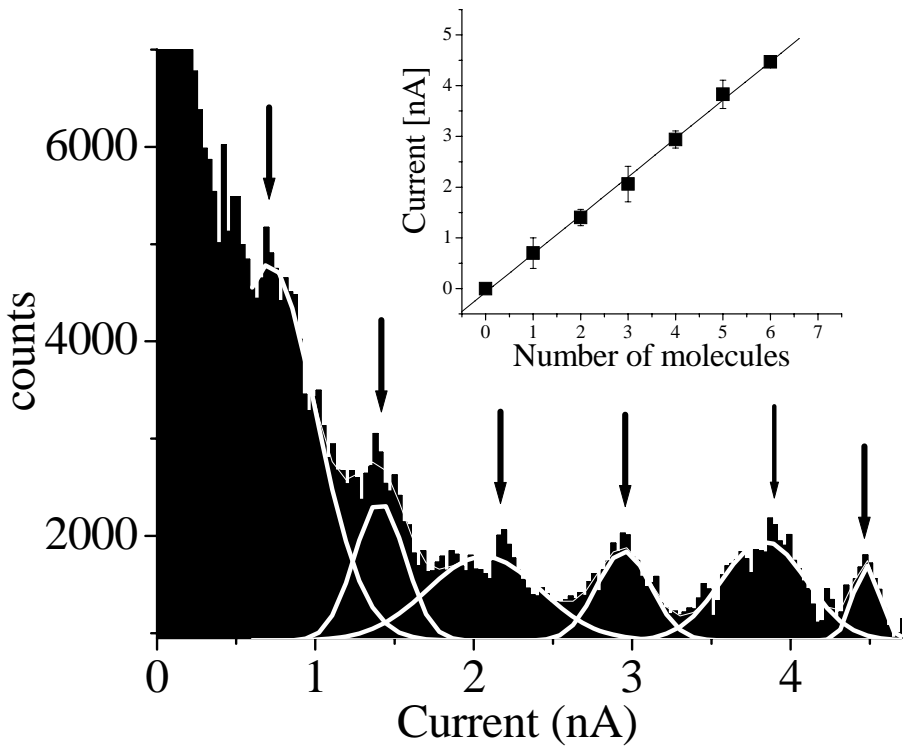

Supplement: pnas_0600593103_1.pdf [file pnas_0600593103_1.pdf]

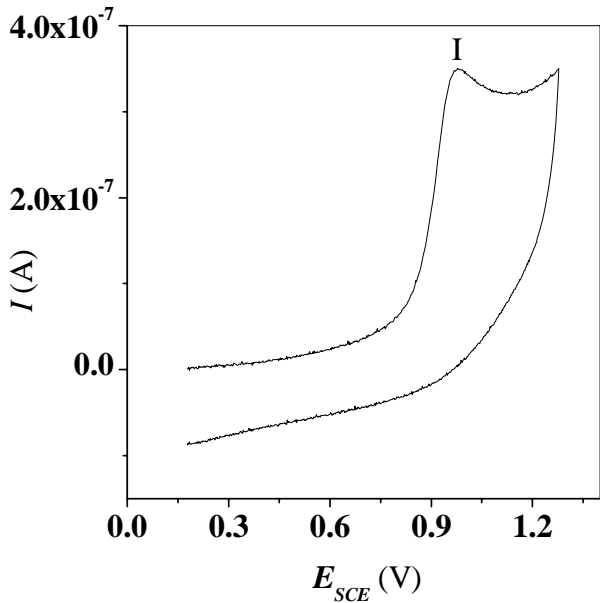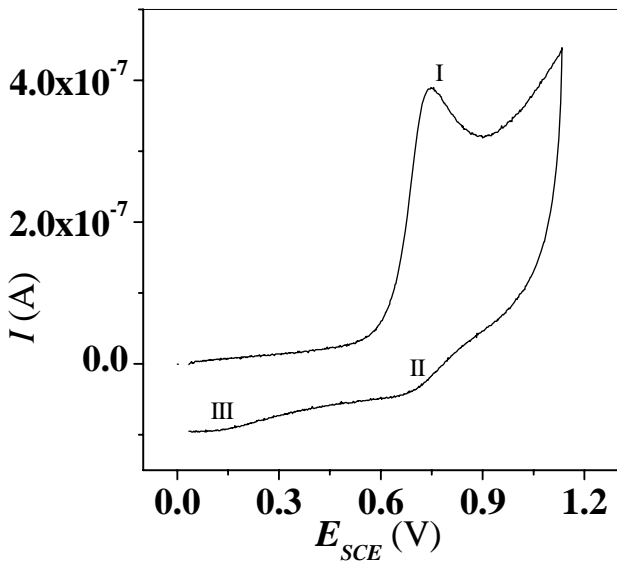

Supplement: pnas_0600593103_2.pdf [file pnas_0600593103_2.pdf]

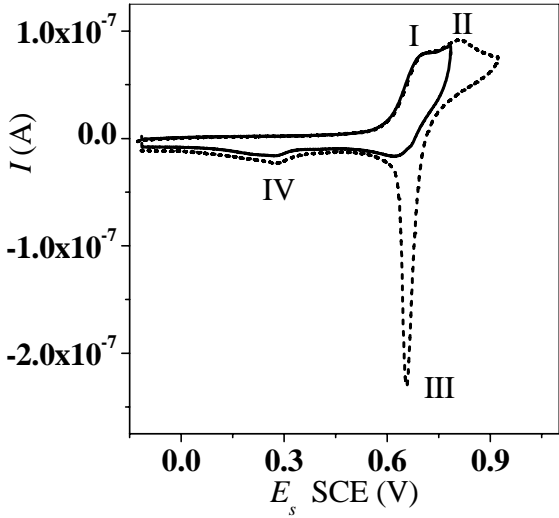

Supplement: pnas_0600593103_3.pdf [file pnas_0600593103_3.pdf]
